# Supplementary material for: Night Work and Breast Cancer Risk in Nurses: Multifactorial Risk Analysis
Source: MDPI journal article supplement (doi:10.3390/cancers13061470), 2021-03-23
Supplement: s1 [file s1]

## Study on breast cancer and shift-work in nurses

Dear Colleague,

The International Agency for Research on Cancer (IARC), in 2010, classified shift-work as a likely carcinogenic factor for humans (Group 2A) due to the high incidence of breast cancer in women who work in night-shifts, such as nurses. Therefore, the objective of this project is to investigate the possible relationship between shift work, especially night work, and the development of breast cancer in this population.

The research team guarantees that all your answers will be treated anonymously and confidentially, being your participation totally voluntary.

To express your acceptance to participate in this study, please check the following box with a cross:

**I agree to participate voluntarily in this study, once I received the information \***  Yes

---

### PERSONAL DATA

---

Gender:  Woman  Man Age: \_\_\_\_ Years

Current marital status:

Single  Married  Divorced  Widow/er  Other: \_\_\_\_\_

Indicate the studies you have pursued and finished: *You can check more than one option*

Graduate or similar  University Master

Nurse Specialist  Doctorate

---

### GENERAL DATA

---

Are you diagnosed with any illnesses? Indicate it: \_\_\_\_\_

Have you had any cancers throughout your life?  Yes  No

Indicate type: \_\_\_\_\_

Has your mother or sister ever had breast cancer throughout their life?

Yes, both  Yes, my sister  Yes, my mother  No

Have you used oral contraceptives throughout your life?  Yes  No  Not indicated

If you indicated «**YES**», for how long? \_\_\_\_\_ years.

How many mammograms have you done throughout your life? \_\_\_\_\_ mammograms.

In your work, have you had regular exposure to electromagnetic fields (e.g. X-rays)?

No, never  Sometimes

In your work, have you had regular exposure to cytostatics?

No, never  Sometimes

If you have checked the option "**No, never**" go to question **HAB01**. If you have checked "**Sometimes**", indicate the approximate number of cumulative months you have been exposed: \_\_\_\_\_ months (*electromagnetic fields*) \_\_\_\_\_ months (*cytostatics*)

---

### LIFESTYLE

---

Height: \_\_\_\_\_ cm.      Weight: \_\_\_\_\_ kg

How do you consider the physical activity you develop in your work?

Light       Moderate       Hard       Very hard

How many hours did you spend last week doing physical exercise in your free time?

\_\_\_\_\_ hours doing physical exercise the last week.

---

### FAMILY RESPONSIBILITY

---

Do you have children under the age of 14?     Yes     No    How many?: \_\_\_\_\_

Do you have dependents family (elderly, disabled or family members with a serious illness) in your care?     Yes     No    How many?: \_\_\_\_\_

---

### SLEEP AND REST

---

Do you have a regular sleep schedule?     Yes       No

Do you use any medication to get to sleep?     Yes       No       No, but previously yes

---

### TOBACCO EXPOSURE

---

Did you ever smoke cigarettes?     Yes       No

Do you currently smoke cigarettes?

Yes, everyday     Yes, some days     No, I don't smoke

How many cigarettes a day? (*Indicate 0 if you do not smoke*): \_\_\_\_\_ cigarettes

In your opinion, is the smoking ban complied in your job?

Totally       Almost always       Hardly ever       Never

How many hours a day are you exposed to tobacco smoke in your workplace? \_\_\_\_\_ hours

At work, how many hours a day do you spend with smokers? \_\_\_\_\_ hours

How often are you exposed to tobacco smoke inside your home?

Never or hardly ever       Less than one hour a day

Between 1 and 5 hours a day       More than 5 hours a day

---

## LABOUR DATA

---

### CURRENT JOB

Indicate what type of corporation you are currently working on.

Type of system:     Public system             Private system

Attention level:     Primary Care             Specialized Care

Type of organization:

Public                             Public enterprise             Consortium

Health alliance             Private                             Other: \_\_\_\_\_

How long have you been working at your current company?

Less than 30 days.     Between 1 and 6 months.     Between 6 months and 2 years.

2 – 5 years.             5 – 10 years.             More than 10 years.

Your current main job is:     Full-time     Part-time

Indicate the type of shift in the position you currently hold:

- |                                                       |                                                 |                                                        |
|-------------------------------------------------------|-------------------------------------------------|--------------------------------------------------------|
| <input type="checkbox"/> Only morning                 | <input type="checkbox"/> Only afternoon/evening | <input type="checkbox"/> Only nights                   |
| <input type="checkbox"/> Morning and night            | <input type="checkbox"/> Morning and afternoon  | <input type="checkbox"/> Afternoon and nights          |
| <input type="checkbox"/> Morning, afternoon and night | <input type="checkbox"/> 24h-shift              | <input type="checkbox"/> 12h-shift (morning and night) |
| <input type="checkbox"/> Only morning + Eventual 24h  | <input type="checkbox"/> Irregular              | <input type="checkbox"/> Other:                        |

### PROFESSIONAL CAREER

Indicate the number of accumulated years you've been working on (throughout your life):

\_\_\_ years

Indicate how many years you have worked regularly more than 3 nights per month:

\_\_\_ years

Indicate the number of working nights accumulated throughout your life (approx.):

\_\_\_ nights

Indicate the age at which you started performing night shifts (*indicate 0 if you have not performed night shifts*):

\_\_\_ years

**MEDICAL/SICK LEAVES**

With regard to your sick leaves from work (in the last 12 months): *You can check more than one option.*

- Aproximately, I have been \_\_\_\_ days off due to illness in the last year.
- I haven't been on sick leave in the last year.
- I have had \_\_\_\_ sick leaves the last year.
  
- I've taken other types of sick leave (indicate type and number)\_\_\_\_\_

If you have been on sick leave, please indicate the disease \_\_\_\_\_

**SUGGESTIONS**

If you have any suggestions, recommendations, consultations or would like to reflect any issues in the course of the questionnaire, please do so below:

**THANK YOU VERY MUCH FOR YOUR INVALUABLE COLLABORATION.**
